# Supplementary material
Source: Research Square preprint supplement (doi:10.21203/rs.3.rs-9796002/v1)
Supplement: Supplementary file 1 [file bdac564881559f403711f901.docx]

**Comprehensive Evaluation of Polymorphism in SLC11A1 and its Association with Susceptibility to Tuberculosis: A Meta-Analysis**

**Sneha Chhonkar1**, Priyanka2, Sadhna Sharma3, Monika Sharma3*

1 Department of Zoology, Miranda House, University of Delhi, Delhi, India

2 Texas Biomedical Research Institute, San Antonio, Texas, United States

3 DSKC BioDiscovery Laboratory and Department of Zoology, Miranda House, University of Delhi, Delhi, India

*Corresponding author

E-mail addresses:

[sneha.2022.1427@mirandahouse.ac.in](mailto:sneha.2022.1427@mirandahouse.ac.in) (Sneha Chhonkar)

[monika.sharma@mirandahouse.ac.in](mailto:monika.sharma@mirandahouse.ac.in) (Monika Sharma)

**
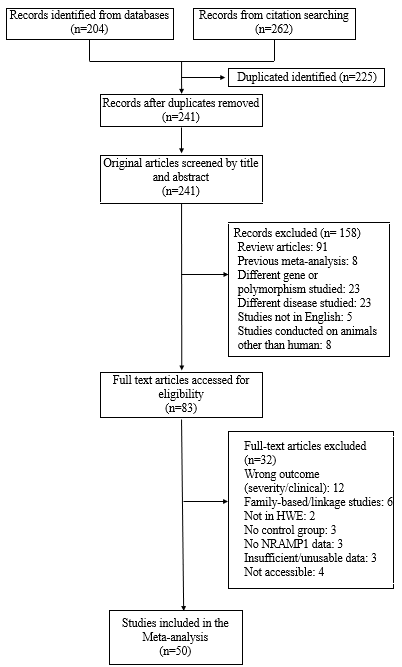
**

**Fig.S.1. PRISMA flow-chart of literature search of Solute carrier 11 family 1 (SLC11A1) gene polymorphisms.**

**Table.S.1. Distribution of SLC11A1 genotype and allele among TB cases and control.**

1. **D543N**

| **First author** | **Case** | | | **Control** | | | **Case** | | **Control** | | **HWE** |
| --- | --- | --- | --- | --- | --- | --- | --- | --- | --- | --- | --- |
| **GG** | **GA** | **AA** | **GG** | **GA** | **AA** | **G** | **A** | **G** | **A** |
| Abe | 76 | 18 | 1 | 76 | 14 | 0 | 170 | 20 | 166 | 14 | Yes |
| Asai | 47 | 9 | 1 | 50 | 0 | 1 | 103 | 11 | 100 | 2 | Yes |
| Ates | 108 | 4 | 0 | 79 | 1 | 0 | 220 | 4 | 159 | 1 | Yes |
| Bellamy | 337 | 68 | 0 | 375 | 41 | 1 | 742 | 68 | 791 | 43 | Yes |
| Ben Selma | 143 | 70 | 10 | 115 | 34 | 1 | 356 | 90 | 264 | 36 | Yes |
| Chen | 103 | 37 | 0 | 118 | 21 | 0 | 243 | 37 | 257 | 21 | Yes |
| Delgado | 228 | 115 | 12 | 57 | 49 | 0 | 571 | 139 | 163 | 49 | Yes |
| Fernandez | 81 | 8 | 3 | 89 | 10 | 1 | 170 | 14 | 188 | 12 | Yes |
| Freidin | 263 | 14 | 1 | 127 | 12 | 0 | 540 | 16 | 266 | 12 | Yes |
| Freidin | 191 | 39 | 6 | 198 | 57 | 8 | 421 | 51 | 453 | 73 | Yes |
| Farnia | 35 | 35 | 1 | 7 | 32 | 0 | 105 | 37 | 46 | 32 | Yes |
| Gao | 210 | 51 | 6 | 177 | 23 | 2 | 471 | 63 | 377 | 27 | Yes |
| Hanta | 124 | 3 | 0 | 110 | 6 | 0 | 251 | 3 | 226 | 6 | Yes |
| Hatta | 33 | 20 | 5 | 115 | 77 | 6 | 86 | 30 | 307 | 89 | Yes |
| Hsu | 62 | 21 | 5 | 63 | 22 | 5 | 145 | 31 | 148 | 32 | Yes |
| Hsu | 56 | 25 | 2 | 64 | 19 | 3 | 137 | 29 | 147 | 25 | Yes |
| Jafari | 91 | 5 | 0 | 112 | 10 | 0 | 187 | 5 | 234 | 10 | Yes |
| Jin | 96 | 32 | 2 | 324 | 60 | 6 | 224 | 36 | 708 | 72 | Yes |
| Kim | 31 | 6 | 0 | 43 | 2 | 0 | 68 | 6 | 88 | 2 | Yes |
| Leung | 192 | 78 | 8 | 220 | 57 | 5 | 462 | 94 | 497 | 67 | Yes |
| Li | 158 | 67 | 2 | 426 | 82 | 8 | 383 | 71 | 934 | 98 | Yes |
| Liu | 109 | 11 | 0 | 231 | 9 | 0 | 229 | 11 | 471 | 9 | Yes |
| Liaw | 34 | 11 | 4 | 34 | 14 | 0 | 79 | 19 | 82 | 14 | Yes |
| Merza | 111 | 6 | 0 | 44 | 16 | 0 | 228 | 6 | 104 | 16 | Yes |
| Nino moreno | 54 | 36 | 4 | 67 | 40 | 3 | 144 | 44 | 174 | 46 | Yes |
| Nugraha | 35 | 28 | 6 | 28 | 15 | 0 | 98 | 40 | 71 | 15 | Yes |
| Qu | 44 | 16 | 1 | 97 | 23 | 2 | 104 | 18 | 217 | 27 | Yes |
| Ryu | 146 | 43 | 3 | 164 | 27 | 1 | 335 | 49 | 355 | 29 | Yes |
| Sahiratmadia | 136 | 62 | 7 | 217 | 112 | 21 | 334 | 76 | 546 | 154 | Yes |
| Selvaraj | 126 | 28 | 1 | 93 | 19 | 0 | 280 | 30 | 205 | 19 | Yes |
| Singh | 83 | 18 | 0 | 166 | 58 | 1 | 184 | 18 | 390 | 60 | Yes |
| Soborg | 189 | 61 | 1 | 269 | 73 | 2 | 439 | 63 | 611 | 77 | Yes |
| Soborg | 62 | 7 | 0 | 166 | 10 | 0 | 131 | 7 | 342 | 10 | Yes |
| Solgun | 48 | 2 | 0 | 45 | 5 | 0 | 98 | 2 | 95 | 5 | Yes |
| Stagas | 138 | 4 | 0 | 139 | 5 | 0 | 280 | 4 | 283 | 5 | Yes |
| Shahzad | 158 | 67 | 2 | 426 | 82 | 8 | 383 | 71 | 934 | 98 | Yes |
| Taype | 417 | 196 | 17 | 372 | 124 | 17 | 1030 | 230 | 868 | 158 | Yes |
| Tiksnadi | 104 | 56 | 4 | 85 | 31 | 7 | 264 | 64 | 201 | 45 | Yes |
| Vejbaesya | 102 | 42 | 5 | 106 | 34 | 7 | 246 | 52 | 246 | 48 | Yes |
| Wu | 136 | 15 | 0 | 420 | 33 | 0 | 287 | 15 | 873 | 33 | Yes |
| Waworuntu | 27 | 7 | 0 | 27 | 8 | 0 | 61 | 7 | 62 | 8 | Yes |
| Zaida Araujo | 6 | 2 | 5 | 77 | 11 | 2 | 14 | 12 | 165 | 15 | Yes |
| Zhang W | 89 | 37 | 1 | 74 | 17 | 0 | 215 | 39 | 165 | 17 | Yes |

1. **3’UTR TGTG ins/del**

| **First author** | **Case** | | | **Control** | | | **Case** | | **Control** | | **HWE** |
| --- | --- | --- | --- | --- | --- | --- | --- | --- | --- | --- | --- |
| TGTG+/+ | TGTG+/- | TGTG-/- | TGTG+/+ | TGTG+/- | TGTG-/- | TGTG + | TGTG- | TGTG+ | TGTG- |  |
| Abe | 76 | 18 | 1 | 76 | 14 | 0 | 170 | 20 | 166 | 14 | Yes |
| Asai | 25 | 26 | 6 | 31 | 15 | 5 | 76 | 38 | 77 | 25 | Yes |
| Ates | 108 | 4 | 0 | 79 | 1 | 0 | 220 | 4 | 159 | 1 | Yes |
| Ben Selma | 80 | 67 | 21 | 60 | 52 | 15 | 227 | 109 | 172 | 82 | Yes |
| Chen | 84 | 50 | 6 | 101 | 36 | 2 | 218 | 62 | 238 | 40 | Yes |
| De wit | 393 | 85 | 14 | 261 | 48 | 3 | 871 | 113 | 570 | 54 | Yes |
| Delgado | 228 | 115 | 12 | 57 | 49 | 0 | 571 | 139 | 163 | 49 | Yes |
| Duan | 95 | 50 | 2 | 115 | 29 | 1 | 240 | 54 | 259 | 31 | Yes |
| Fernandez | 57 | 29 | 3 | 79 | 21 | 0 | 143 | 35 | 179 | 21 | Yes |
| Fitness | 126 | 74 | 17 | 353 | 287 | 69 | 326 | 108 | 993 | 425 | Yes |
| Fitness | 112 | 91 | 15 | 353 | 287 | 69 | 315 | 121 | 993 | 425 | Yes |
| Farnia | 68 | 2 | 1 | 37 | 2 | 0 | 138 | 4 | 76 | 2 | Yes |
| Hatta | 33 | 20 | 5 | 115 | 77 | 6 | 86 | 30 | 307 | 89 | Yes |
| Hsu | 44 | 38 | 3 | 46 | 28 | 5 | 126 | 44 | 120 | 38 | Yes |
| Jafari | 91 | 5 | 0 | 113 | 9 | 0 | 187 | 5 | 235 | 9 | Yes |
| Jin jung | 104 | 30 | 2 | 383 | 48 | 4 | 238 | 34 | 814 | 56 | Yes |
| Kim | 30 | 8 | 0 | 43 | 2 | 0 | 68 | 8 | 88 | 2 | Yes |
| Leung | 192 | 78 | 8 | 220 | 57 | 5 | 462 | 94 | 497 | 67 | Yes |
| Li | 138 | 63 | 12 | 167 | 41 | 3 | 339 | 87 | 375 | 47 | Yes |
| Liu | 74 | 44 | 2 | 178 | 56 | 6 | 192 | 48 | 412 | 68 | Yes |
| Liu | 37 | 23 | 0 | 24 | 5 | 1 | 97 | 23 | 53 | 7 | Yes |
| Liaw | 34 | 12 | 3 | 33 | 12 | 3 | 80 | 18 | 78 | 18 | Yes |
| Medapati | 72 | 13 | 6 | 83 | 5 | 0 | 157 | 25 | 171 | 5 | Yes |
| Merza | 110 | 7 | 0 | 57 | 3 | 0 | 227 | 7 | 117 | 3 | Yes |
| Meng | 159 | 56 | 9 | 185 | 36 | 4 | 374 | 74 | 406 | 44 | Yes |
| Nugraha | 35 | 14 | 29 | 28 | 13 | 2 | 84 | 72 | 69 | 17 | Yes |
| Ryu | 146 | 43 | 3 | 164 | 27 | 1 | 335 | 49 | 355 | 29 | Yes |
| Sahiratmadja | 141 | 66 | 7 | 226 | 116 | 21 | 348 | 80 | 568 | 158 | Yes |
| Singh | 44 | 32 | 25 | 130 | 61 | 34 | 120 | 82 | 321 | 129 | Yes |
| Soborg | 63 | 6 | 0 | 168 | 8 | 0 | 132 | 6 | 344 | 8 | Yes |
| Soborg | 139 | 90 | 22 | 204 | 119 | 25 | 368 | 134 | 527 | 169 | Yes |
| Solgun | 46 | 3 | 0 | 45 | 5 | 0 | 95 | 3 | 95 | 5 | Yes |
| Stagas | 137 | 4 | 1 | 139 | 4 | 1 | 278 | 6 | 282 | 6 | Yes |
| TAYPE | 345 | 144 | 18 | 378 | 120 | 15 | 834 | 180 | 876 | 150 | Yes |
| Tiksnadi | 75 | 43 | 5 | 85 | 31 | 7 | 193 | 53 | 201 | 45 | Yes |
| Vejbaesya | 102 | 42 | 5 | 106 | 34 | 7 | 246 | 52 | 246 | 48 | Yes |
| Wu | 97 | 50 | 4 | 361 | 87 | 5 | 244 | 58 | 809 | 97 | Yes |
| Wu fang | 138 | 63 | 12 | 167 | 41 | 3 | 339 | 87 | 375 | 47 | Yes |

1. **INT4**

| **First author** | **Case** | | | **Control** | | | **Case** | | **Control** | | **HWE** |
| --- | --- | --- | --- | --- | --- | --- | --- | --- | --- | --- | --- |
| **GG** | **GC** | **CC** | **GG** | **GC** | **CC** | **G** | **C** | **G** | **C** |
| Abe | 70 | 24 | 1 | 64 | 26 | 0 | 164 | 26 | 154 | 26 | Yes |
| Asai | 37 | 17 | 3 | 42 | 9 | 0 | 91 | 23 | 93 | 9 | Yes |
| Ates | 80 | 29 | 3 | 62 | 17 | 1 | 189 | 35 | 141 | 19 | Yes |
| Bellamy | 320 | 78 | 3 | 360 | 48 | 3 | 718 | 84 | 768 | 54 | Yes |
| Chen | 127 | 13 | 0 | 133 | 6 | 0 | 267 | 13 | 272 | 6 | Yes |
| Fernandez | 45 | 35 | 9 | 39 | 45 | 14 | 125 | 53 | 123 | 73 | Yes |
| Freidin | 179 | 94 | 6 | 97 | 38 | 2 | 452 | 106 | 232 | 42 | Yes |
| Freidin | 198 | 32 | 3 | 224 | 36 | 3 | 428 | 38 | 484 | 42 | Yes |
| Farnia | 46 | 19 | 6 | 26 | 13 | 0 | 111 | 31 | 65 | 13 | Yes |
| Hanta | 80 | 42 | 5 | 72 | 39 | 5 | 202 | 52 | 183 | 49 | Yes |
| Hatta | 52 | 6 | 0 | 177 | 21 | 0 | 110 | 6 | 375 | 21 | Yes |
| Hsu | 92 | 13 | 0 | 91 | 2 | 0 | 197 | 13 | 184 | 2 | Yes |
| Hsu | 85 | 20 | 3 | 73 | 19 | 0 | 190 | 26 | 165 | 19 | Yes |
| Jafari | 65 | 31 | 0 | 88 | 34 | 0 | 161 | 31 | 210 | 34 | Yes |
| Jin jung | 93 | 40 | 3 | 319 | 109 | 7 | 226 | 46 | 747 | 123 | Yes |
| Kim | 23 | 16 | 2 | 41 | 4 | 0 | 62 | 20 | 86 | 4 | Yes |
| Liu | 78 | 37 | 5 | 144 | 89 | 7 | 193 | 47 | 377 | 103 | Yes |
| Merza | 77 | 39 | 1 | 40 | 20 | 0 | 193 | 41 | 100 | 20 | Yes |
| Nugraha | 67 | 2 | 0 | 40 | 3 | 0 | 136 | 2 | 83 | 3 | Yes |
| Puzyrev | 36 | 22 | 0 | 62 | 40 | 2 | 94 | 22 | 164 | 44 | Yes |
| Qu | 39 | 21 | 1 | 100 | 22 | 0 | 99 | 23 | 222 | 22 | Yes |
| Singh | 48 | 33 | 20 | 189 | 33 | 3 | 129 | 73 | 411 | 39 | Yes |
| Soborg | 195 | 55 | 1 | 283 | 63 | 2 | 445 | 57 | 629 | 67 | Yes |
| Soborg | 32 | 34 | 3 | 76 | 87 | 13 | 98 | 40 | 239 | 113 | Yes |
| Solgun | 34 | 15 | 1 | 33 | 17 | 0 | 83 | 17 | 83 | 17 | Yes |
| Stagas | 84 | 48 | 10 | 93 | 49 | 2 | 216 | 68 | 235 | 53 | Yes |
| Shahzad | 41 | 20 | 103 | 62 | 19 | 4 | 102 | 226 | 143 | 27 | Yes |
| TAYPE | 243 | 291 | 96 | 221 | 239 | 53 | 777 | 483 | 681 | 345 | Yes |
| Vejbaesya | 130 | 19 | 0 | 131 | 16 | 0 | 279 | 19 | 278 | 16 | Yes |
| Wu | 100 | 45 | 6 | 273 | 166 | 14 | 245 | 57 | 712 | 194 | Yes |
| Zhang w | 93 | 33 | 1 | 76 | 15 | 0 | 219 | 35 | 167 | 15 | Yes |

1. **(GT)n**

| **First author** | **Cases** | | **Control** | | **HWE** |
| --- | --- | --- | --- | --- | --- |
|  | **Other alleles** | **Allele 3** | **Other alleles** | **Allele 3** |
| Ates | 38 | 186 | 28 | 132 | Yes |
| Bellamy | 151 | 651 | 115 | 705 | Yes |
| Chen | 96 | 184 | 61 | 217 | Yes |
| de Wit | 220 | 776 | 107 | 523 | Yes |
| Fitness | 103 | 361 | 352 | 1204 | Yes |
| Gao | 129 | 405 | 59 | 345 | Yes |
| Hsu | 19 | 183 | 4 | 172 | Yes |
| Hsu | 30 | 190 | 18 | 138 | Yes |
| Leung | 78 | 478 | 71 | 493 | Yes |
| Ma | 68 | 158 | 42 | 174 | Yes |
| Soborg | 22 | 72 | 101 | 231 | Yes |
| Soborg | 99 | 387 | 102 | 578 | Yes |

**Table S.2. Summary of Fixed effects estimates from different comparative genetic models.**

1. **D543N**

| Model | Ethnicity | Number of studies | Test of association | | | Model | Test of heterogeneity | |
| --- | --- | --- | --- | --- | --- | --- | --- | --- |
|  | OR | 95% CI | P | P | **I²** |
| Dominant | Overall | 43 | 1.286 | 1.181-1.400 | <0.0001 | Fixed effects | <0.0001 | 64.3% |
|  | Asian | 26 | 1.394 | 1.253- 1.552 | **<**0.0001 | Fixed effects | 0.0014 | 51.4% |
|  | Middle Eastern | 6 | 0.337 | 0.209-0.543 | **<**0.0001 | Fixed effects | 0.1433 | 39.3% |
|  | Latin American | 5 | 1.173 | 0.964-1.427 | 0.372 | Fixed effects | 0.0029 | 75.1% |
|  | African | 3 | 1.537 | 1.210-1.952 | 0.0005 | Fixed effects | 0.224 | 33.2% |
|  | European | 3 | 0.899 | 0.509-1.588 | 0.819 | Fixed effects | 0.218 | 34.3% |
| Allelic | Overall | 43 | 1.244 | 1.154-1.342 | <0.0001 | Fixed effects | <0.0001 | 63.6% |
| Recessive | Overall | 43 | 1.224 | 0.943-1.588 | 0.146 | Fixed effects | 0.174 | 19.1% |
| Heterozygous | Overall | 43 | 1.281 | 1.177-1.398 | <0.0001 | Fixed effects | <0.0001 | 63.5% |
| Homozygous | Overall | 43 | 1.280 | 0.984–1.665 | 0.075 | Fixed effects | 0.116 | 18.0% |

1. **3’UTR TGTG ins/del**

| Model | Ethnicity | Number of studies | Test of association | | | Model | Test of heterogeneity | |
| --- | --- | --- | --- | --- | --- | --- | --- | --- |
| OR | 95% CI | P | P | **I²** |
| Allelic | Overall | 38 | 1.294 | 1.234–1.601 | **<**0.0001 | Fixed effects | <0.0001 | 65.2% |
|  | Asian | 23 | 1.569 | 1.429-1.723 | **<**0.0001 | Fixed effects | 0.006 | 55.9% |
|  | Middle eastern | 5 | 0.947 | 0.506-1.774 | 0.993 | Fixed effects | 0.772 | 0% |
|  | Latin American | 3 | 1.189 | 0.984-1.436 | 0.077 | Fixed effects | 0.018 | 74.8% |
|  | African | 5 | 0.946 | 0.825-1.085 | 0.972 | Fixed effects | 0.0577 | 56.2% |
|  | European | 2 | 1.129 | 0.873-1.458 | 0.388 | Fixed effects | 0.850 | 0% |
| Dominant | Overall | 38 | 1.344 | 1.239-1.457 | **<**0.0001 | Fixed effects | <0.0001 | 58.6% |
| Recessive | Overall | 38 | 1361 | 1.140-1.627 | 0.0009 | Fixed effects | 0.031 | 34.4% |
| Heterozygous | Overall | 38 | 1.311 | 1.204-1.426 | <0.0001 | Fixed effects | 0.0001 | 52.1% |
| Homozygous | Overall | 38 | 1.422 | 1.186-1.1705 | 0.0002 | Fixed effects | 0.031 | 39.5% |

1. **INT4**

| Model | Ethnicity | Number of studies | Test of association | | | Model | Test of heterogeneity | |
| --- | --- | --- | --- | --- | --- | --- | --- | --- |
|  | OR | 95% CI | P | P | **I²** |
| Dominant | Overall | 30 | 1.258 | 1.142-1.386 | <0.0001 | Fixed effects | <0.0001 | 64.4% |
|  | Asian | 16 | 1.179 | 1.011-1.375 | 0.0379 | Fixed effects | 0.0016 | 58.6% |
|  | Middle Eastern | 6 | 1.095 | 0.839-1.428 | 0.546 | Fixed effects | 0.957 | 0% |
|  | Latin American | 2 | 1.101 | 0.884-1.370 | 0.418 | Fixed effects | 0.051 | 73.7% |
|  | African | 2 | 1.511 | 1.148-1.990 | 0.004 | Fixed effects | 0.206 | 37.4% |
|  | European | 2 | 1.310 | 0.947-1.812 | 0.1213 | Fixed effects | 0.825 | 0% |
| Allelic | Overall | 31 | 1.373 | 1.268–1.486 | <0.0001 | Fixed effects | <0.0001 | 66.4% |
| Recessive | Overall | 30 | 1.704 | 1.349-2.153 | <0.0001 | Fixed effects | 0.116 | 26.4% |
| Heterozygous | Overall | 30 | 1.195 | 1.081-1.320 | 0.0005 | Fixed effects | 0.0001 | 53.8% |
| Homozygous | Overall | 30 | 1.772 | 1.393-2.254 | <0.0001 | Fixed effects | 0.026 | 39.4% |

1. **(GT)n**

| Model | Ethnicity | Number of studies | Test of association | | | Model | Test of heterogeneity | |
| --- | --- | --- | --- | --- | --- | --- | --- | --- |
| OR | 95% CI | P | P | **I²** |
| Allelic | Overall | 12 | 1.339 | 1.211–1.481 | <0.0001 | Fixed effects | 0.004 | 60.2% |
